# Supplementary material for: Effect of BCHE single nucleotide polymorphisms on lipid metabolism markers in women
Source: PubMed Central journal article supplement (PMC5488457; doi:10.1590/1678-4685-gmb-2016-0123), 2017-05-11
Supplement: 1415-4757-gmb-1678-4685-GMB-2016-0123-Suppl01.pdf [file 1415-4757-gmb-1678-4685-GMB-2016-0123-Suppl01.pdf]

**Table S1** – Anthropometric and biochemical variables (mean  $\pm$  standard error) in obese and non-obese women stratified by usual homozygous and less frequent alleles carriers for -116G>A, 1615G>A and 1914A>G SNPs.

| Parameter                | Obese                               |                                                     | p            | Non-obese                           |                                                     | p     |
|--------------------------|-------------------------------------|-----------------------------------------------------|--------------|-------------------------------------|-----------------------------------------------------|-------|
|                          | 116AA + 1615AA + 1914GG<br>(n = 81) | (-116AG+AA) + (1615AG+AA) + (1914AG+GG)<br>(n = 21) |              | 116AA + 1615AA + 1914GG<br>(n = 32) | (-116AG+AA) + (1615AG+AA) + (1914AG+GG)<br>(n = 10) |       |
| BMI (kg/m <sup>2</sup> ) | 35.53 $\pm$ 0.61                    | 34.37 $\pm$ 0.73                                    | 0.695        | 21.94 $\pm$ 0.35                    | 22.04 $\pm$ 0.54                                    | 0.916 |
| BChE activity (kU/L)     | 5.37 $\pm$ 0.18                     | 4.59 $\pm$ 0.35                                     | <b>0.009</b> | 5.23 $\pm$ 0.33                     | 4.19 $\pm$ 0.44                                     | 0.175 |
| HDL-C (mg/dL)            | 52.55 $\pm$ 1.58                    | 51.24 $\pm$ 2.94                                    | 0.670        | 54.63 $\pm$ 2.70                    | 50.4 $\pm$ 4.34                                     | 0.440 |
| LDL-C (mg/dL)            | 113.00 $\pm$ 3.42                   | 123.25 $\pm$ 6.64                                   | 0.164        | 120.01 $\pm$ 5.84                   | 106.3 $\pm$ 5.71                                    | 0.219 |
| TG (mg/dL)               | 148.22 $\pm$ 6.87                   | 121.95 $\pm$ 11.40                                  | <b>0.026</b> | 93.41 $\pm$ 6.63                    | 120.9 $\pm$ 25.43                                   | 0.937 |
| TC (mg/dL)               | 194.99 $\pm$ 3.90                   | 198.85 $\pm$ 7.99                                   | 0.658        | 190.06 $\pm$ 7.86                   | 179.9 $\pm$ 9.35                                    | 0.322 |

BChE: Butyrylcholinesterase; BMI: body mass index; TG: triglycerides; TC: total cholesterol; HDL-C: high density lipoprotein cholesterol; LDL-C: low density lipoprotein cholesterol.
