# Supplementary material for: Effect of BCHE single nucleotide polymorphisms on lipid metabolism markers in women
Source: PubMed Central journal article supplement (PMC5488457; doi:10.1590/1678-4685-gmb-2016-0123), 2017-05-11
Supplement: 1415-4757-gmb-1678-4685-GMB-2016-0123-Suppl02.pdf [file 1415-4757-gmb-1678-4685-GMB-2016-0123-Suppl02.pdf]

**Table S2** - Anthropometric and biochemical variables (mean  $\pm$  standard error) in obese and non-obese women stratified by usual homozygous and less frequent alleles carriers for 1615G>A and 1914A>G SNPs.

| Parameter                | Obese              |                              |              | Non-obese          |                              |       |
|--------------------------|--------------------|------------------------------|--------------|--------------------|------------------------------|-------|
|                          | 1615AA +<br>1914GG | (1615AG+AA) +<br>(1914AG+GG) | P            | 1615AA +<br>1914GG | (1615AG+AA) +<br>(1914AG+GG) | P     |
|                          | (n = 86)           | (n = 64)                     |              | (n = 32)           | (n = 10)                     |       |
| BMI (kg/m <sup>2</sup> ) | 35.51 $\pm$ 0.6    | 35.96 $\pm$ 0.64             | 0.469        | 21.93 $\pm$ 0.35   | 22.37 $\pm$ 0.35             | 0.378 |
| BChE activity (kU/L)     | 5.34 $\pm$ 0.17    | 4.91 $\pm$ 0.20              | <b>0.039</b> | 5.23 $\pm$ 0.33    | 4.98 $\pm$ 0.35              | 0.850 |
| HDL-C (mg/dL)            | 52.63 $\pm$ 1.49   | 49.08 $\pm$ 1.39             | 0.202        | 54.63 $\pm$ 2.70   | 54.6 $\pm$ 3.31              | 0.816 |
| LDL-C (mg/dL)            | 113.12 $\pm$ 3.34  | 117.7 $\pm$ 3.62             | 0.322        | 120.01 $\pm$ 5.84  | 107.21 $\pm$ 7.34            | 0.422 |
| TG (mg/dL)               | 146.95 $\pm$ 6.57  | 124.63 $\pm$ 6.22            | <b>0.014</b> | 93.41 $\pm$ 6.63   | 107.47 $\pm$ 12.93           | 0.401 |
| TC (mg/dL)               | 194.94 $\pm$ 3.8   | 191.6 $\pm$ 4.33             | 0.563        | 190.06 $\pm$ 7.86  | 180.24 $\pm$ 11.67           | 0.471 |

BChE: Butyrylcholinesterase; BMI: body mass index; TG: triglycerides; TC: total cholesterol; HDL-C: high density lipoprotein cholesterol; LDL-C: low density lipoprotein cholesterol.
