# Supplementary material for: Effect of BCHE single nucleotide polymorphisms on lipid metabolism markers in women
Source: PubMed Central journal article supplement (PMC5488457; doi:10.1590/1678-4685-gmb-2016-0123), 2017-05-11
Supplement: 1415-4757-gmb-1678-4685-GMB-2016-0123-Suppl03.pdf [file 1415-4757-gmb-1678-4685-GMB-2016-0123-Suppl03.pdf]

**Table S3** - Anthropometric and biochemical variables (mean  $\pm$  standard error) in obese and non-obese women stratified by usual homozygous and less frequent alleles carriers for -116G>A and 1914A>G SNPs.

| Parameter                | Obese                       |                                          | p            | Non-obese                      |                                          | p     |
|--------------------------|-----------------------------|------------------------------------------|--------------|--------------------------------|------------------------------------------|-------|
|                          | -116AA + 1914GG<br>(n = 88) | (-116AG+AA) +<br>(1914AG+GG)<br>(n = 25) |              | -116AA +<br>1914GG<br>(n = 33) | (-116AG+AA) +<br>(1914AG+GG)<br>(n = 11) |       |
| BMI (kg/m <sup>2</sup> ) | 35.42 $\pm$ 0.59            | 35.96 $\pm$ 0.64                         | 0.751        | 21.97 $\pm$ 0.39               | 21.84 $\pm$ 0.57                         | 0.839 |
| BChE activity<br>(kU/L)  | 5.33 $\pm$ 0.17             | 4.91 $\pm$ 0.20                          | <b>0.002</b> | 5.19 $\pm$ 0.32                | 4.30 $\pm$ 0.50                          | 0.203 |
| HDL-C (mg/dL)            | 52.57 $\pm$ 1.44            | 49.08 $\pm$ 1.39                         | 0.948        | 54.27 $\pm$ 2.63               | 51.22 $\pm$ 4.76                         | 0.487 |
| LDL-C (mg/dL)            | 112.63 $\pm$ 3.29           | 117.7 $\pm$ 3.62                         | 0.211        | 121.37 $\pm$ 5.82              | 103.67 $\pm$ 5.66                        | 0.181 |
| TG (mg/dL)               | 150.76 $\pm$ 6.76           | 124.63 $\pm$ 6.22                        | <b>0.046</b> | 92.57 $\pm$ 6.48               | 103.33 $\pm$ 20.56                       | 0.880 |
| TC (mg/dL)               | 195.16 $\pm$ 3.66           | 191.6 $\pm$ 4.33                         | 0.661        | 191. $\pm$ 7.67                | 174.44 $\pm$ 8.47                        | 0.290 |

BChE: Butyrylcholinesterase; BMI: body mass index; TG: triglycerides; TC: total cholesterol; HDL-C: high density lipoprotein cholesterol; LDL-C: low density lipoprotein cholesterol.
