# Supplementary material for: Effect of BCHE single nucleotide polymorphisms on lipid metabolism markers in women
Source: PubMed Central journal article supplement (PMC5488457; doi:10.1590/1678-4685-gmb-2016-0123), 2017-05-11
Supplement: 1415-4757-gmb-1678-4685-GMB-2016-0123-Suppl04.pdf [file 1415-4757-gmb-1678-4685-GMB-2016-0123-Suppl04.pdf]

**Table S4** - Anthropometric and biochemical variables (mean  $\pm$  standard error) in obese and non-obese women stratified by usual homozygous and less frequent alleles carriers for -116G>A and 1615G>A SNPs.

| Parameter                | Obese                           |                                          | p            | Non-obese                   |                                          | p     |
|--------------------------|---------------------------------|------------------------------------------|--------------|-----------------------------|------------------------------------------|-------|
|                          | -116AA +<br>1615AA<br>(n = 139) | (-116AG+AA) +<br>(1615AG+AA)<br>(n = 28) |              | -116AA + 1615AA<br>(n = 50) | (-116AG+AA) +<br>(1615AG+AA)<br>(n = 13) |       |
| BMI (kg/m <sup>2</sup> ) | 35.05 $\pm$ 0.43                | 34.21 $\pm$ 0.68                         | 0.751        | 22.11 $\pm$ 0.26            | 22.04 $\pm$ 0.54                         | 0.890 |
| BChE activity<br>(kU/L)  | 5.52 $\pm$ 0.15                 | 4.39 $\pm$ 0.30                          | <b>0.000</b> | 5.40 $\pm$ 0.28             | 4.2 $\pm$ 0.45                           | 0.056 |
| HDL-C (mg/dL)            | 51.6 $\pm$ 1.14                 | 52.11 $\pm$ 2.77                         | 0.907        | 53.18 $\pm$ 2.07            | 50.4 $\pm$ 4.34                          | 0.419 |
| LDL-C (mg/dL)            | 114.53 $\pm$ 2.68               | 122.34 $\pm$ 5.39                        | 0.195        | 119.8 $\pm$ 4.96            | 106.3 $\pm$ 5.71                         | 0.153 |
| TG (mg/dL)               | 150.35 $\pm$ 6.81               | 122 $\pm$ 9.65                           | <b>0.043</b> | 99.98 $\pm$ 6.89            | 120.9 $\pm$ 25.43                        | 0.792 |
| TC (mg/dL)               | 196.32 $\pm$ 3.15               | 198.82 $\pm$ 6.68                        | 0.743        | 189.86 $\pm$ 7              | 179.9 $\pm$ 9.34                         | 0.543 |
